# Supplementary material for: DNA Microarray Platform for Detection and Surveillance of Viruses Transmitted by Small Mammals and Arthropods
Source: PubMed Central journal article supplement (PMC5031435; doi:10.1371/journal.pntd.0005017), 2016-09-21
Supplement: pntd.0005017.s002.pdf [file pntd.0005017.s002.pdf]

| <b>Virus name / RoboArboChip v1</b> | <b>Virus name / RoboArboChip v2</b> | <b>Genus</b>    | <b>Family</b> |
|-------------------------------------|-------------------------------------|-----------------|---------------|
| Abu Hammad virus                    | Abu Hammad virus                    | Nairovirus      | Bunyaviridae  |
| Abu Mina virus                      | Abu Mina virus                      | Nairovirus      | Bunyaviridae  |
| Adelaide River virus                | Adelaide River virus                | Ephemerovirus   | Rhabdoviridae |
| African horsesickness virus         | African horsesickness virus         | Orbivirus       | Reoviridae    |
| African swine fever virus           | African swine fever virus           | Asfarvirus      | Asfarviridae  |
| Aguacate virus                      | Aguacate virus                      | Phlebovirus     | Bunyaviridae  |
| Aino virus                          | Aino virus                          | Orthobunyavirus | Bunyaviridae  |
| Akabane virus                       | Akabane virus                       | Orthobunyavirus | Bunyaviridae  |
| Alenquer virus                      | Alenquer virus                      | Phlebovirus     | Bunyaviridae  |
| Alkhurma hemorrhagic fever virus    | Alkhurma hemorrhagic fever virus    | Flavivirus      | Flaviviridae  |
| Allpahuayo virus                    | Allpahuayo virus                    | Arenavirus      | Arenaviridae  |
| Altai virus                         | Altai virus                         | Hantavirus      | Bunyaviridae  |
| Alto Paraguay hantavirus            | Alto Paraguay hantavirus            | Hantavirus      | Bunyaviridae  |
| Amapari virus                       | Amapari virus                       | Arenavirus      | Arenaviridae  |
| Amur virus                          | Amur virus                          | Hantavirus      | Bunyaviridae  |
| ANAJ Hantavirus                     | ANAJ Hantavirus                     | Hantavirus      | Bunyaviridae  |
| Andes virus                         | Andes virus                         | Hantavirus      | Bunyaviridae  |
| Anhembi virus                       | Anhembi virus                       | Orthobunyavirus | Bunyaviridae  |
| Anopheles A virus                   | Anopheles A virus                   | Orthobunyavirus | Bunyaviridae  |
| Anopheles B virus                   | Anopheles B virus                   | Orthobunyavirus | Bunyaviridae  |
| Apeu virus                          | Apeu virus                          | Orthobunyavirus | Bunyaviridae  |
| Apoi virus                          | Apoi virus                          | Flavivirus      | Flaviviridae  |
| Araraquara virus                    | Araraquara virus                    | Hantavirus      | Bunyaviridae  |
| Araucaria virus                     | Araucaria virus                     | Hantavirus      | Bunyaviridae  |
| Arbia virus                         | Arbia virus                         | Phlebovirus     | Bunyaviridae  |
| Ariquemes virus                     | Ariquemes virus                     | Phlebovirus     | Bunyaviridae  |
| Armero virus                        | Armero virus                        | Flavivirus      | Flaviviridae  |
| Aroa virus                          | Aroa virus                          | Flavivirus      | Flaviviridae  |
| Artybash virus                      | Artybash virus                      | Hantavirus      | Bunyaviridae  |
| Arumowot virus                      | Arumowot virus                      | Phlebovirus     | Bunyaviridae  |
| Asama virus                         | Asama virus                         | Hantavirus      | Bunyaviridae  |
| Ash River virus                     | Ash River virus                     | Hantavirus      | Bunyaviridae  |
| Aura virus                          | Aura virus                          | Alphavirus      | Togaviridae   |
| Babanki virus                       | Babanki virus                       | Alphavirus      | Togaviridae   |
| Bagaza virus                        | Bagaza virus                        | Flavivirus      | Flaviviridae  |
| Bandia virus                        | Bandia virus                        | Nairovirus      | Bunyaviridae  |
| Bannavirus                          | Banna virus                         | Seadornavirus   | Reoviridae    |
| Banzi virus                         | Banzi virus                         | Flavivirus      | Flaviviridae  |
| Barmah Forest virus                 | Barmah Forest virus                 | Alphavirus      | Togaviridae   |
| Batai virus                         | Batai virus                         | Orthobunyavirus | Bunyaviridae  |
| Batama virus                        | Batama virus                        | Orthobunyavirus | Bunyaviridae  |
| Batu Cave virus                     | Batu Cave virus                     | Flavivirus      | Flaviviridae  |
| Bayou virus                         | Bayou virus                         | Hantavirus      | Bunyaviridae  |
| Bear Canyon virus                   | Bear Canyon virus                   | Arenavirus      | Arenaviridae  |
| Bebaru virus                        | Bebaru virus                        | Alphavirus      | Togaviridae   |
| Belterra virus                      | Belterra virus                      | Phlebovirus     | Bunyaviridae  |
| Bermejo virus                       | Bermejo virus                       | Hantavirus      | Bunyaviridae  |
| Berrimah virus                      | Berrimah virus                      | Ephemerovirus   | Rhabdoviridae |
| Bhanja virus                        | Bhanja virus                        | Phlebovirus     | Bunyaviridae  |
| Big brushy tank virus               | Big brushy tank virus               | Arenavirus      | Arenaviridae  |
| Birao virus                         | Birao virus                         | Orthobunyavirus | Bunyaviridae  |
| Black Creek Canal virus             | Black Creek Canal virus             | Hantavirus      | Bunyaviridae  |
| Black Mesa virus                    | Black Mesa virus                    | Arenavirus      | Arenaviridae  |
| Blue River virus                    | Blue River virus                    | Hantavirus      | Bunyaviridae  |
| Bluetongue virus                    | Bluetongue virus                    | Orbivirus       | Reoviridae    |
| Boraceia virus                      | Boraceia virus                      | Orthobunyavirus | Bunyaviridae  |
| Bouboui virus                       | Bouboui virus                       | Flavivirus      | Flaviviridae  |

|                                       |                                       |                 |               |
|---------------------------------------|---------------------------------------|-----------------|---------------|
| Bovine ephemeral fever virus          | Bovine ephemeral fever virus          | Ephemerovirus   | Rhabdoviridae |
| Bozo virus                            | Bozo virus                            | Orthobunyavirus | Bunyaviridae  |
| Broadhaven virus                      | Broadhaven virus                      | Orbivirus       | Reoviridae    |
| Buenaventura virus                    | Buenaventura virus                    | Phlebovirus     | Bunyaviridae  |
| Buggy Creek virus                     | Buggy Creek virus                     | Alphavirus      | Togaviridae   |
| Bujaru virus                          | Bujaru virus                          | Phlebovirus     | Bunyaviridae  |
| Bukalasa bat virus                    | Bukalasa bat virus                    | Flavivirus      | Flaviviridae  |
| Bunyamwera virus                      | Bunyamwera virus                      | Orthobunyavirus | Bunyaviridae  |
| Bussuquara virus                      | Bussuquara virus                      | Flavivirus      | Flaviviridae  |
| Bwamba virus                          | Bwamba virus                          | Orthobunyavirus | Bunyaviridae  |
| Cabassou virus                        | Cabassou virus                        | Alphavirus      | Togaviridae   |
| Cacao virus                           | Cacao virus                           | Phlebovirus     | Bunyaviridae  |
| Cache Valley virus                    | Cache Valley virus                    | Orthobunyavirus | Bunyaviridae  |
| Cachoeira Porteira virus              | Cachoeira Porteira virus              | Orthobunyavirus | Bunyaviridae  |
| Cacipacore virus                      | Cacipacore virus                      | Flavivirus      | Flaviviridae  |
| California encephalitis virus         | California encephalitis virus         | Orthobunyavirus | Bunyaviridae  |
| Calovo virus                          | Calovo virus                          | Orthobunyavirus | Bunyaviridae  |
| Camp Ripley virus                     | Camp Ripley virus                     | Hantavirus      | Flaviviridae  |
| Candiru virus                         | Candiru virus                         | Phlebovirus     | Bunyaviridae  |
| Cano - Delgadito virus                | Cano - Delgadito virus                | Hantavirus      | Bunyaviridae  |
| Cao Bang virus                        | Cao Bang virus                        | Hantavirus      | Bunyaviridae  |
| Carajas virus                         | Carajas virus                         | Vesiculovirus   | Rhabdoviridae |
| Caraparu                              | Caraparu virus                        | Orthobunyavirus | Bunyaviridae  |
| Carey Island virus                    | Carey Island virus                    | Flavivirus      | Flaviviridae  |
| Carrizal virus                        | Carrizal virus                        | Hantavirus      | Bunyaviridae  |
| Castelo dos Sonhos virus              | Castelo dos Sonhos virus              | Hantavirus      | Bunyaviridae  |
| Catacamas virus                       | Catacamas virus                       | Hantavirus      | Bunyaviridae  |
| Catarina virus                        | Catarina virus                        | Arenavirus      | Arenaviridae  |
| Catch-me-cave virus                   | Catch-me-cave virus                   | Phlebovirus     | Bunyaviridae  |
| Cell fusing agent virus               | Cell fusing agent virus               | Flavivirus      | Flaviviridae  |
| Chagres virus                         | Chagres virus                         | Phlebovirus     | Bunyaviridae  |
| Chandipura virus                      | Chandipura virus                      | Vesiculovirus   | Rhabdoviridae |
| Chandiru virus                        | Chandiru virus                        | Phlebovirus     | Bunyaviridae  |
| Chapare virus                         | Chapare virus                         | Arenavirus      | Arenaviridae  |
| Chatanga virus                        | Chatanga virus                        | Orthobunyavirus | Bunyaviridae  |
| Chikungunya virus                     | Chikungunya virus                     | Alphavirus      | Togaviridae   |
| Choclo virus                          | Choclo virus                          | Hantavirus      | Bunyaviridae  |
| Cholul virus                          | Cholul virus                          | Orthobunyavirus | Bunyaviridae  |
| Chuzan Virus                          | Chuzan Virus                          | Orbivirus       | Reoviridae    |
| Cocal virus                           | Cocal virus                           | Vesiculovirus   | Rhabdoviridae |
| Colorado tick fever virus             | Colorado tick fever virus             | Coltivirus      | Reoviridae    |
|                                       | Convict Creek 107 virus               | Hantavirus      | Bunyaviridae  |
| Corfou virus                          | Corfou virus                          | Phlebovirus     | Bunyaviridae  |
| Cowbone Ridge virus                   | Cowbone Ridge virus                   | Flavivirus      | Flaviviridae  |
| Crimean-Congo hemorrhagic fever virus | Crimean-Congo hemorrhagic fever virus | Nairovirus      | Bunyaviridae  |
| Cupixi virus                          | Cupixi virus                          | Arenavirus      | Arenaviridae  |
| Cy1014 virus                          | Cy1014 virus                          | Flavivirus      | Flaviviridae  |
| D' Aguilar virus                      | D' Aguilar virus                      | Orbivirus       | Reoviridae    |
| Dakar bat virus                       | Dakar bat virus                       | Flavivirus      | Flaviviridae  |
| Dandenong virus                       | Dandenong virus                       | Arenavirus      | Arenaviridae  |
| Deer tick virus                       | Deer tick virus                       | Flavivirus      | Flaviviridae  |
| Dengue virus type 1                   | Dengue virus type 1                   | Flavivirus      | Flaviviridae  |
| Dengue virus type 2                   | Dengue virus type 2                   | Flavivirus      | Flaviviridae  |
| Dengue virus type 3                   | Dengue virus type 3                   | Flavivirus      | Flaviviridae  |
| Dengue virus type 4                   | Dengue virus type 4                   | Flavivirus      | Flaviviridae  |
| Dobrava-Belgrade virus                | Dobrava-Belgrade virus                | Hantavirus      | Bunyaviridae  |
| Douglas virus                         | Douglas virus                         | Orthobunyavirus | Bunyaviridae  |
| Dugbe virus                           | Dugbe virus                           | Nairovirus      | Bunyaviridae  |

|                                        |                                        |                 |               |
|----------------------------------------|----------------------------------------|-----------------|---------------|
| Durania virus                          | Durania virus                          | Phlebovirus     | Bunyaviridae  |
| Eastern equine encephalitis virus      | Eastern equine encephalitis virus      | Alphavirus      | Togaviridae   |
| Echarte virus                          | Echarte virus                          | Phlebovirus     | Bunyaviridae  |
| Edge Hill virus                        | Edge Hill virus                        | Flavivirus      | Flaviviridae  |
| EgAN 1825-61 virus                     | EgAN 1825-61 virus                     | Phlebovirus     | Bunyaviridae  |
| El Moro Canyon virus                   | El Moro Canyon virus                   | Hantavirus      | Bunyaviridae  |
| Entebbe bat virus                      | Entebbe bat virus                      | Flavivirus      | Flaviviridae  |
| Eothenomys miletus hantavirus          | Eothenomys miletus Hantavirus          | Hantavirus      | Bunyaviridae  |
| Epizootic hemorrhagic disease virus 1  | Epizootic hemorrhagic disease virus    | Orbivirus       | Reoviridae    |
| Equine encephalosis virus              | Equine encephalosis virus              | Orbivirus       | Reoviridae    |
| Erve virus                             | Erve virus                             | Nairovirus      | Bunyaviridae  |
| Eyach virus                            | Eyach virus                            | Coltivirus      | Reoviridae    |
| Farallon virus                         | Farallon virus                         | Nairovirus      | Bunyaviridae  |
| Flexal virus                           | Flexal virus                           | Arenavirus      | Arenaviridae  |
| Fort Morgan virus                      | Fort Morgan virus                      | Alphavirus      | Togaviridae   |
| Fort Sherman virus                     | Fort Sherman virus                     | Orthobunyavirus | Bunyaviridae  |
| Four Corners Hantavirus                | Four Corners Hantavirus                | Hantavirus      | Bunyaviridae  |
| Frijoles virus                         | Frijoles virus                         | Phlebovirus     | Bunyaviridae  |
| Gabek Forest virus                     | Gabek Forest virus                     | Phlebovirus     | Bunyaviridae  |
| Gadgets Gully virus                    | Gadgets Gully virus                    | Flavivirus      | Flaviviridae  |
| Gbagroube virus                        | Gbagroube virus                        | Arenavirus      | Arenaviridae  |
| Germiston virus                        | Germiston virus                        | Orthobunyavirus | Bunyaviridae  |
| Getah virus                            | Getah virus                            | Alphavirus      | Togaviridae   |
| Granada virus                          | Granada virus                          | Phlebovirus     | Bunyaviridae  |
| Great Island virus                     | Great Island virus                     | Orbivirus       | Reoviridae    |
| Greek goat encephalitis virus          | Greek goat encephalitis virus          | Flavivirus      | Flaviviridae  |
| Guanarito virus                        | Guanarito virus                        | Arenavirus      | Arenaviridae  |
| Guaroa virus                           | Guaroa virus                           | Orthobunyavirus | Bunyaviridae  |
| Gumbo Limbo virus                      | Gumbo Limbo virus                      | Orthobunyavirus | Bunyaviridae  |
| Hantaan virus                          | Hantaan virus                          | Hantavirus      | Bunyaviridae  |
| Hazara virus                           | Hazara virus                           | Nairovirus      | Bunyaviridae  |
| Heartland virus                        | Heartland virus                        | Phlebovirus     | Bunyaviridae  |
| Highlands J virus                      | Highlands J virus                      | Alphavirus      | Togaviridae   |
| HoJo virus                             | HoJo virus                             | Hantavirus      | Bunyaviridae  |
| Hokkaido virus                         | Hokkaido virus                         | Hantavirus      | Bunyaviridae  |
| Huitzilac virus                        | Huitzilac virus                        | Hantavirus      | Bunyaviridae  |
| I612045 virus                          | I612045 virus                          | Orthobunyavirus | Bunyaviridae  |
| Iaco virus                             | Iaco virus                             | Orthobunyavirus | Bunyaviridae  |
| Icoaraci virus                         | Icoaraci virus                         | Phlebovirus     | Bunyaviridae  |
| Iguape virus                           | Iguape virus                           | Flavivirus      | Flaviviridae  |
| Ilesha virus                           | Ilesha virus                           | Orthobunyavirus | Bunyaviridae  |
| Ilheus virus                           | Ilheus virus                           | Flavivirus      | Flaviviridae  |
| Imjin virus                            | Imjin virus                            | Hantavirus      | Bunyaviridae  |
| Ingwavuma virus                        | Ingwavuma virus                        | Orthobunyavirus | Bunyaviridae  |
| Inkoo virus                            | Inkoo virus                            | Orthobunyavirus | Bunyaviridae  |
| Ippy virus                             | Ippy virus                             | Arenavirus      | Arenaviridae  |
| Isfahan virus                          | Isfahan virus                          | Vesiculovirus   | Rhabdoviridae |
| Isla Vista virus                       | Isla Vista virus                       | Hantavirus      | Bunyaviridae  |
| Israel turkey meningoencephalomyelitis | Israel turkey meningoencephalomyelitis | Flavivirus      | Flaviviridae  |
| Itaituba virus                         | Itaituba virus                         | Phlebovirus     | Bunyaviridae  |
| Itaporanga virus                       | Itaporanga virus                       | Phlebovirus     | Bunyaviridae  |
| Itaqui virus                           | Itaqui virus                           | Orthobunyavirus | Bunyaviridae  |
| Ixcanal virus                          | Ixcanal virus                          | Phlebovirus     | Bunyaviridae  |
| Jabora virus                           | Jabora virus                           | Hantavirus      | Bunyaviridae  |
| Jacunda Virus                          | Jacunda Virus                          | Flavivirus      | Flaviviridae  |
| Jamestown Canyon virus                 | Jamestown Canyon virus                 | Orthobunyavirus | Bunyaviridae  |
| Japanese encephalitis virus            | Japanese encephalitis virus            | Flavivirus      | Flaviviridae  |
| Jeju virus                             | Jeju virus                             | Hantavirus      | Bunyaviridae  |

|                                    |                                    |                 |               |
|------------------------------------|------------------------------------|-----------------|---------------|
| Jerry Slough virus                 | Jerry Slough virus                 | Orthobunyavirus | Bunyaviridae  |
| Joa virus                          | Joa virus                          | Phlebovirus     | Bunyaviridae  |
| Jugra virus                        | Jugra virus                        | Flavivirus      | Flaviviridae  |
| Junin virus                        | Junin virus                        | Arenavirus      | Arenaviridae  |
| Jurona virus                       | Jurona virus                       | Vesiculovirus   | Rhabdoviridae |
| Jutiapa virus                      | Jutiapa virus                      | Flavivirus      | Flaviviridae  |
| Kadam virus                        | Kadam virus                        | Flavivirus      | Flaviviridae  |
| Kadipiro virus                     | Kadipiro virus                     | Seadornavirus   | Reoviridae    |
| Kaeng Khoi virus                   | Kaeng Khoi virus                   | Orthobunyavirus | Bunyaviridae  |
| Kairi virus                        | Kairi virus                        | Orthobunyavirus | Bunyaviridae  |
| Karimabad virus                    | Karimabad virus                    | Phlebovirus     | Bunyaviridae  |
| Karshi virus                       | Karshi virus                       | Flavivirus      | Flaviviridae  |
| Kedougou virus                     | Kedougou virus                     | Flavivirus      | Flaviviridae  |
| Kemerovo virus                     | Kemerovo virus                     | Orbivirus       | Reoviridae    |
| Kenkeme virus                      | Kenkeme virus                      | Hantavirus      | Bunyaviridae  |
| Keystone virus                     | Keystone virus                     | Orthobunyavirus | Bunyaviridae  |
| Khabarovsk                         | Khabarovsk                         | Hantavirus      | Bunyaviridae  |
| Kimberley virus                    | Kimberley virus                    | Ephemerovirus   | Rhabdoviridae |
| Klamath virus                      | Klamath virus                      | Vesiculovirus   | Rhabdoviridae |
| Kodoko virus                       | Kodoko virus                       | Arenavirus      | Arenaviridae  |
| Kokobera virus                     | Kokobera virus                     | Flavivirus      | Flaviviridae  |
| Koutango virus                     | Koutango virus                     | Flavivirus      | Flaviviridae  |
| Kunjin virus                       | Kunjin virus                       | Flavivirus      | Flaviviridae  |
| Kupe virus                         | Kupe virus                         | Nairovirus      | Bunyaviridae  |
| La Crosse virus                    | La Crosse virus                    | Orthobunyavirus | Bunyaviridae  |
| Laguna Negra virus                 | Laguna Negra virus                 | Hantavirus      | Bunyaviridae  |
| Langat virus                       | Langat virus                       | Flavivirus      | Flaviviridae  |
| Lassa virus                        | Lassa virus                        | Arenavirus      | Arenaviridae  |
| Latino virus                       | Latino virus                       | Arenavirus      | Arenaviridae  |
| Leanyer virus                      | Leanyer virus                      | Orthobunyavirus | Bunyaviridae  |
| Lechiguanas virus                  | Lechiguanas virus                  | Hantavirus      | Bunyaviridae  |
| Liao ning virus                    | Liao ning virus                    | Seadornavirus   | Reoviridae    |
| Lipovnik virus                     | Lipovnik virus                     | Orbivirus       | Reoviridae    |
| Lokern virus                       | Lokern virus                       | Orthobunyavirus | Bunyaviridae  |
| Louping ill virus                  | Louping ill virus                  | Flavivirus      | Flaviviridae  |
| Lujo virus                         | Lujo virus                         | Arenavirus      | Arenaviridae  |
| Lumbo virus                        | Lumbo virus                        | Orthobunyavirus | Bunyaviridae  |
| Luna virus                         | Luna virus                         | Arenavirus      | Arenaviridae  |
| Lunk virus                         | Lunk virus                         | Arenavirus      | Arenaviridae  |
| Lymphocytic choriomeningitis virus | Lymphocytic choriomeningitis virus | Arenavirus      | Arenaviridae  |
| M'Poko virus                       | M'Poko virus                       | Orthobunyavirus | Bunyaviridae  |
| Macaua virus                       | Macaua virus                       | Orthobunyavirus | Bunyaviridae  |
| Machupo virus                      | Machupo virus                      | Arenavirus      | Arenaviridae  |
| Maciel virus                       | Maciel virus                       | Hantavirus      | Bunyaviridae  |
| Madrid virus                       | Madrid virus                       | Orthobunyavirus | Bunyaviridae  |
| Maguari virus                      | Maguari virus                      | Orthobunyavirus | Bunyaviridae  |
| Main Drain virus                   | Main Drain virus                   | Orthobunyavirus | Bunyaviridae  |
| Malakal virus                      | Malakal virus                      | Ephemerovirus   | Rhabdoviridae |
| Maldonado virus                    | Maldonado virus                    | Phlebovirus     | Bunyaviridae  |
| Malpais Spring virus               | Malpais Spring virus               | Vesiculovirus   | Rhabdoviridae |
| Maporal virus                      | Maporal virus                      | Hantavirus      | Bunyaviridae  |
| Maraba virus                       | Maraba virus                       | Vesiculovirus   | Rhabdoviridae |
| Maripa hantavirus                  | Maripa Hantavirus                  | Hantavirus      | Bunyaviridae  |
| Marituba virus                     | Marituba virus                     | Orthobunyavirus | Bunyaviridae  |
| Massilia virus                     | Massilia virus                     | Phlebovirus     | Bunyaviridae  |
| Mayaro virus                       | Mayaro virus                       | Alphavirus      | Togaviridae   |
| Meaban virus                       | Meaban virus                       | Flavivirus      | Flaviviridae  |
| Melao virus                        | Melao virus                        | Orthobunyavirus | Bunyaviridae  |

|                                        |                                        |                 |               |
|----------------------------------------|----------------------------------------|-----------------|---------------|
| Menekre virus                          | Menekre virus                          | Arenavirus      | Arenaviridae  |
| Merino Walk virus                      | Merino Walk virus                      | Arenavirus      | Arenaviridae  |
| Middelburg virus                       | Middelburg virus                       | Alphavirus      | Togaviridae   |
| Mobala virus                           | Mobala virus                           | Arenavirus      | Arenaviridae  |
| Modoc virus                            | Modoc virus                            | Flavivirus      | Flaviviridae  |
| Montana myotis leukoencephalitis virus | Montana myotis leukoencephalitis virus | Flavivirus      | Flaviviridae  |
| Montano virus                          | Montano virus                          | Hantavirus      | Bunyaviridae  |
| Mopia virus                            | Mopia virus                            | Arenavirus      | Arenaviridae  |
| Morogoro virus                         | Morogoro virus                         | Arenavirus      | Arenaviridae  |
| Morro Bay virus                        | Morro Bay virus                        | Ephemerovirus   | Rhabdoviridae |
| Morumbi virus                          | Morumbi virus                          | Phlebovirus     | Bunyaviridae  |
| Mount Elgon bat virus                  | Mount Elgon bat virus                  | Vesiculovirus   | Rhabdoviridae |
| Mucambo virus                          | Mucambo virus                          | Alphavirus      | Togaviridae   |
| Mucura virus                           | Mucura virus                           | Phlebovirus     | Bunyaviridae  |
| Muju virus                             | Muju virus                             | Hantavirus      | Bunyaviridae  |
|                                        | Muleshoe virus                         | Hantavirus      | Bunyaviridae  |
| Munguba virus                          | Munguba virus                          | Phlebovirus     | Bunyaviridae  |
| Murray Valley encephalitis virus       | Murray Valley encephalitis virus       | Flavivirus      | Flaviviridae  |
| Murutucu virus                         | Murutucu virus                         | Orthobunyavirus | Bunyaviridae  |
| Nairobi sheep disease virus            | Nairobi sheep disease virus            | Nairovirus      | Bunyaviridae  |
| Naranjal virus                         | Naranjal virus                         | Flavivirus      | Flaviviridae  |
| Ndumu virus                            | Ndumu virus                            | Alphavirus      | Togaviridae   |
| Neembucu Hantavirus                    | Neembucu Hantavirus                    | Hantavirus      | Bunyaviridae  |
|                                        | Negishi virus                          | Flavivirus      | Flaviviridae  |
| Nepuyo virus                           | Nepuyo virus                           | Orthobunyavirus | Bunyaviridae  |
| New York virus                         | New York virus                         | Hantavirus      | Bunyaviridae  |
| Newfound Gap hantavirus                | Newfound Gap Hantavirus                | Hantavirus      | Bunyaviridae  |
| Ngari virus                            | Ngari virus                            | Orthobunyavirus | Bunyaviridae  |
| Nique virus                            | Nique virus                            | Phlebovirus     | Bunyaviridae  |
| Nola virus                             | Nola virus                             | Orthobunyavirus | Bunyaviridae  |
| North American arenavirus              | North American arenavirus              | Arenavirus      | Arenaviridae  |
| Northway virus                         | Northway virus                         | Orthobunyavirus | Bunyaviridae  |
| Nova virus                             | Nova virus                             | Hantavirus      | Bunyaviridae  |
| Ntaya virus                            | Ntaya virus                            | Phlebovirus     | Bunyaviridae  |
| Nyabira virus                          | Nyabira virus                          | Orbivirus       | Reoviridae    |
| Nyando virus                           | Nyando virus                           | Orthobunyavirus | Bunyaviridae  |
| Odrenisrou virus                       | Odrenisrou virus                       | Phlebovirus     | Bunyaviridae  |
| Oliveros virus                         | Oliveros virus                         | Arenavirus      | Arenaviridae  |
| Omsk hemorrhagic fever virus           | Omsk hemorrhagic fever virus           | Flavivirus      | Flaviviridae  |
| Oran virus                             | Oran virus                             | Hantavirus      | Bunyaviridae  |
| Oriboca virus                          | Oriboca virus                          | Orthobunyavirus | Bunyaviridae  |
| Oriximina virus                        | Oriximina virus                        | Phlebovirus     | Bunyaviridae  |
| Orogrande virus                        | Orogrande virus                        | Arenavirus      | Arenaviridae  |
| Oropouche virus                        | Oropouche virus                        | Orthobunyavirus | Bunyaviridae  |
| Oxbow virus                            | Oxbow virus                            | Phlebovirus     | Bunyaviridae  |
| Oyo virus                              | Oyo virus                              | Orthobunyavirus | Bunyaviridae  |
| Palma virus                            | Palma virus                            | Phlebovirus     | Bunyaviridae  |
| Pampa virus                            | Pampa virus                            | Arenavirus      | Arenaviridae  |
| Parana virus                           | Parana virus                           | Arenavirus      | Arenaviridae  |
| Pata virus                             | Pata virus                             | Orbivirus       | Reoviridae    |
| Peaton virus                           | Peaton virus                           | Orthobunyavirus | Bunyaviridae  |
| Pergamino virus                        | Pergamino virus                        | Hantavirus      | Bunyaviridae  |
| Perinet virus                          | Perinet virus                          | Vesiculovirus   | Rhabdoviridae |
| Phnom Penh bat virus                   | Phnom Penh bat virus                   | Flavivirus      | Flaviviridae  |
| Pichinde virus                         | Pichinde virus                         | Arenavirus      | Arenaviridae  |
| Pike fry rhabdovirus                   | Pike fry rhabdovirus                   | Vesiculovirus   | Rhabdoviridae |
| Pirital virus                          | Pirital virus                          | Arenavirus      | Arenaviridae  |
| Piry virus                             | Piry virus                             | Vesiculovirus   | Rhabdoviridae |

|                               |                               |                 |              |
|-------------------------------|-------------------------------|-----------------|--------------|
| Playa de Oro hantavirus       | Playa de Oro Hantavirus       | Hantavirus      | Bunyaviridae |
| Playas virus                  | Playas virus                  | Orthobunyavirus | Bunyaviridae |
| Pongola virus                 | Pongola virus                 | Orthobunyavirus | Bunyaviridae |
| Potiskum virus                | Potiskum virus                | Flavivirus      | Flaviviridae |
| Powassan virus                | Powassan virus                | Flavivirus      | Flaviviridae |
| Precarious point virus        | Precarious point virus        | Phlebovirus     | Bunyaviridae |
| Prospect Hill virus           | Prospect Hill virus           | Hantavirus      | Bunyaviridae |
| Punique virus                 | Punique virus                 | Phlebovirus     | Bunyaviridae |
| Punta Salinas virus           | Punta Salinas virus           | Nairovirus      | Bunyaviridae |
| Punta Toro virus              | Punta Toro virus              | Phlebovirus     | Bunyaviridae |
| Puumala virus                 | Puumala virus                 | Hantavirus      | Bunyaviridae |
| Qalyub virus                  | Qalyub virus                  | Nairovirus      | Bunyaviridae |
| Qiandao Lake virus            | Qiandao Lake virus            | Hantavirus      | Bunyaviridae |
| Raza virus                    | Raza virus                    | Nairovirus      | Bunyaviridae |
| Restan virus                  | Restan virus                  | Orthobunyavirus | Bunyaviridae |
| Rift Valley fever virus       | Rift Valley fever virus       | Phlebovirus     | Bunyaviridae |
| Rio Bravo virus               | Rio Bravo virus               | Flavivirus      | Flaviviridae |
| Rio Grande virus              | Rio Grande virus              | Phlebovirus     | Bunyaviridae |
| Rio Mamore virus              | Rio Mamore virus              | Hantavirus      | Bunyaviridae |
| Rio Negro virus               | Rio Negro virus               | Alphavirus      | Togaviridae  |
| Rio Segundo virus             | Rio Segundo virus             | Hantavirus      | Bunyaviridae |
| Rocio virus                   | Rocio virus                   | Flavivirus      | Flaviviridae |
| Rockport virus                | Rockport virus                | Hantavirus      | Bunyaviridae |
| Ross River virus              | Ross River virus              | Alphavirus      | Togaviridae  |
| Royal Farm virus              | Royal Farm virus              | Flavivirus      | Flaviviridae |
| Saaremaa virus                | Saaremaa virus                | Hantavirus      | Bunyaviridae |
| Sabia virus                   | Sabia virus                   | Arenavirus      | Arenaviridae |
| Saboya virus                  | Saboya virus                  | Flavivirus      | Flaviviridae |
| Sagiyama virus                | Sagiyama virus                | Alphavirus      | Togaviridae  |
| Saint Croix River virus       | Saint Croix River virus       | Orbivirus       | Reoviridae   |
| Sal Vieja virus               | Sal Vieja virus               | Flavivirus      | Flaviviridae |
| Salehabad virus               | Salehabad virus               | Phlebovirus     | Bunyaviridae |
|                               | Salmon pancreas disease virus | Alphavirus      | Togaviridae  |
| Salobo virus                  | Salobo virus                  | Phlebovirus     | Bunyaviridae |
| San Angelo virus              | San Angelo virus              | Orthobunyavirus | Bunyaviridae |
| Sandfly fever Naples virus    | Sandfly fever Naples virus    | Phlebovirus     | Bunyaviridae |
| Sandfly fever sicilian virus  | Sandfly fever sicilian virus  | Phlebovirus     | Bunyaviridae |
| Sandfly Sicilian Turkey virus | Sandfly Sicilian Turkey virus | Phlebovirus     | Bunyaviridae |
| Sangassou virus               | Sangassou virus               | Hantavirus      | Bunyaviridae |
| Sango virus                   | Sango virus                   | Orthobunyavirus | Bunyaviridae |
| Sapporo rat virus             | Sapporo rat virus             | Hantavirus      | Bunyaviridae |
| Sathuperi virus               | Sathuperi virus               | Orthobunyavirus | Bunyaviridae |
| Saumarez Reef virus           | Saumarez Reef virus           | Flavivirus      | Flaviviridae |
| Schmallenberg virus           | Schmallenberg virus           | Orthobunyavirus | Bunyaviridae |
| Seewis virus                  | Seewis virus                  | Hantavirus      | Bunyaviridae |
| Semliki Forest virus          | Semliki Forest virus          | Alphavirus      | Togaviridae  |
| Seoul virus                   | Seoul virus                   | Hantavirus      | Bunyaviridae |
| Sepik virus                   | Sepik virus                   | Flavivirus      | Flaviviridae |
| Serang virus                  | Serang virus                  | Hantavirus      | Bunyaviridae |
| Serra do Navio virus          | Serra do Navio virus          | Orthobunyavirus | Bunyaviridae |
| Serra Norte virus             | Serra Norte virus             | Phlebovirus     | Bunyaviridae |
| Shamonda virus                | Shamonda virus                | Orthobunyavirus | Bunyaviridae |
| Shokwe virus                  | Shokwe virus                  | Orthobunyavirus | Bunyaviridae |
| Shuni virus                   | Shuni virus                   | Orthobunyavirus | Bunyaviridae |
| Simbu virus                   | Simbu virus                   | Orthobunyavirus | Bunyaviridae |
| Sin Nombre virus              | Sin Nombre virus              | Hantavirus      | Bunyaviridae |
| Sindbis virus                 | Sindbis virus                 | Alphavirus      | Togaviridae  |
|                               | Sitiawan Virus                | Flavivirus      | Flaviviridae |

|                                       |                                       |                 |               |
|---------------------------------------|---------------------------------------|-----------------|---------------|
| Skinner Tank virus                    | Skinner Tank virus                    | Arenavirus      | Arenaviridae  |
|                                       | Sleeping disease virus                | Alphavirus      | Togaviridae   |
| Snowshoe hare virus                   | Snowshoe Hare virus                   | Orthobunyavirus | Bunyaviridae  |
| Soochong virus                        | Soochong virus                        | Hantavirus      | Bunyaviridae  |
| Sororoca virus                        | Sororoca virus                        | Orthobunyavirus | Bunyaviridae  |
| South River virus                     | South River virus                     | Orthobunyavirus | Bunyaviridae  |
| Southern elephant seal virus          | Southern elephant seal virus          | Alphavirus      | Togaviridae   |
| Spondweeni virus                      | Spondweeni virus                      | Flavivirus      | Flaviviridae  |
| Spring viraemia of carp virus         | Spring viraemia of carp virus         | Vesiculovirus   | Rhabdoviridae |
| St. Louis encephalitis virus          | St. Louis encephalitis virus          | Flavivirus      | Flaviviridae  |
| Stratford virus                       | Stratford virus                       | Flavivirus      | Flaviviridae  |
| Tacaiuma virus                        | Tacaiuma virus                        | Orthobunyavirus | Bunyaviridae  |
| Tacaribe virus                        | Tacaribe virus                        | Arenavirus      | Arenaviridae  |
| Tahyna virus                          | Tahyna virus                          | Orthobunyavirus | Bunyaviridae  |
| Tamana bat virus                      | Tamana bat virus                      | Flavivirus      | Flaviviridae  |
| Tamiami virus                         | Tamiami virus                         | Arenavirus      | Arenaviridae  |
| Tanganya virus                        | Tanganya virus                        | Hantavirus      | Bunyaviridae  |
| Tehran virus                          | Tehran virus                          | Phlebovirus     | Bunyaviridae  |
| Tembusu virus                         | Tembusu virus                         | Flavivirus      | Flaviviridae  |
| Tensaw virus                          | Tensaw virus                          | Orthobunyavirus | Bunyaviridae  |
| Tete virus                            | Tete virus                            | Orthobunyavirus | Bunyaviridae  |
| Thailand virus                        | Thailand virus                        | Hantavirus      | Bunyaviridae  |
| Thottapalayam virus                   | Thottapalayam virus                   | Hantavirus      | Bunyaviridae  |
| Tick-borne encephalitis virus         | Tick-borne encephalitis virus         | Flavivirus      | Flaviviridae  |
| Tillamook virus                       | Tillamook virus                       | Nairovirus      | Bunyaviridae  |
| Tilligerry virus                      | Tilligerry virus                      | Orbivirus       | Reoviridae    |
| Tinaroo virus                         | Tinaroo virus                         | Orthobunyavirus | Bunyaviridae  |
| Tlacotalpan virus                     | Tlacotalpan virus                     | Orthobunyavirus | Bunyaviridae  |
| Tonate virus                          | Tonate virus                          | Alphavirus      | Togaviridae   |
| Tonto creek virus                     | Tonto creek virus                     | Arenavirus      | Arenaviridae  |
| Topografov virus                      | Topografov virus                      | Hantavirus      | Bunyaviridae  |
| Toscana virus                         | Toscana virus                         | Phlebovirus     | Bunyaviridae  |
| Tribec virus                          | Tribec virus                          | Orbivirus       | Reoviridae    |
| Trivittatus virus                     | Trivittatus virus                     | Orthobunyavirus | Bunyaviridae  |
| Trocar virus                          | Trocar virus                          | Alphavirus      | Togaviridae   |
| Tucunduba virus                       | Tucunduba virus                       | Orthobunyavirus | Bunyaviridae  |
| Tula virus                            | Tula virus                            | Hantavirus      | Bunyaviridae  |
| Tunari virus                          | Tunari virus                          | Hantavirus      | Bunyaviridae  |
| Turkish sheep encephalitis virus      | Turkish sheep encephalitis virus      | Flavivirus      | Flaviviridae  |
| Turuna virus                          | Turuna virus                          | Phlebovirus     | Bunyaviridae  |
| Tyuleniy virus                        | Tyuleniy virus                        | Flavivirus      | Flaviviridae  |
| Uganda S virus                        | Uganda S virus                        | Flavivirus      | Flaviviridae  |
| Umatilla virus                        | Umatilla virus                        | Orbivirus       | Reoviridae    |
| Umbre virus                           | Umbre virus                           | Orthobunyavirus | Bunyaviridae  |
| Una virus                             | Una virus                             | Alphavirus      | Togaviridae   |
| Uriurana virus                        | Uriurana virus                        | Phlebovirus     | Bunyaviridae  |
| Ussuri virus                          | Ussuri virus                          | Hantavirus      | Bunyaviridae  |
| Usutu virus                           | Usutu virus                           | Flavivirus      | Flaviviridae  |
| Utique virus                          | Utique virus                          | Phlebovirus     | Bunyaviridae  |
| Uukuniemi virus                       | Uukuniemi virus                       | Phlebovirus     | Bunyaviridae  |
| Venezuelan equine encephalitis virus  | Venezuelan equine encephalitis virus  | Alphavirus      | Togaviridae   |
| Vesicular stomatitis Alagoas virus    | Vesicular stomatitis Alagoas virus    | Vesiculovirus   | Rhabdoviridae |
| Vesicular stomatitis Indiana virus    | Vesicular stomatitis Indiana virus    | Vesiculovirus   | Rhabdoviridae |
| Vesicular stomatitis New Jersey virus | Vesicular stomatitis New Jersey virus | Vesiculovirus   | Rhabdoviridae |
| Vinces virus                          | Vinces virus                          | Orthobunyavirus | Bunyaviridae  |
| Weldona virus                         | Weldona virus                         | Orthobunyavirus | Bunyaviridae  |
| Wesselsbron virus                     | Wesselsbron virus                     | Flavivirus      | Flaviviridae  |
| West Nile virus                       | West Nile virus                       | Flavivirus      | Flaviviridae  |

|                                   |                                   |                 |               |
|-----------------------------------|-----------------------------------|-----------------|---------------|
| Western equine encephalitis virus | Western equine encephalitis virus | Alphavirus      | Togaviridae   |
| Whataroa virus                    | Whataroa virus                    | Alphavirus      | Togaviridae   |
| Whitewater virus                  | Whitewater virus                  | Arenavirus      | Arenaviridae  |
| Wyeomyia virus                    | Wyeomyia virus                    | Orthobunyavirus | Bunyaviridae  |
| Xingu virus                       | Xingu virus                       | Orthobunyavirus | Bunyaviridae  |
| Yaounde virus                     | Yaounde virus                     | Flavivirus      | Flaviviridae  |
| Yellow fever virus                | Yellow fever virus                | Flavivirus      | Flaviviridae  |
| Yokose virus                      | Yokose virus                      | Flavivirus      | Flaviviridae  |
| Yug Bogdanovac virus              | Yug Bogdanovac virus              | Vesiculovirus   | Rhabdoviridae |
| Yunnan Orbivirus                  | Yunnan Orbivirus                  | Orbivirus       | Reoviridae    |
| Zika virus                        | Zika virus                        | Flavivirus      | Flaviviridae  |
